# Supplementary material for: Identity by Descent Mapping of Founder Mutations in Cancer Using High-Resolution Tumor SNP Data
Source: PubMed Central journal article supplement (PMC3342326; doi:10.1371/journal.pone.0035897), 2012-05-02
Supplement: pone.0035897.s003.pdf [file pone.0035897.s003.pdf]

# Chromosome 17

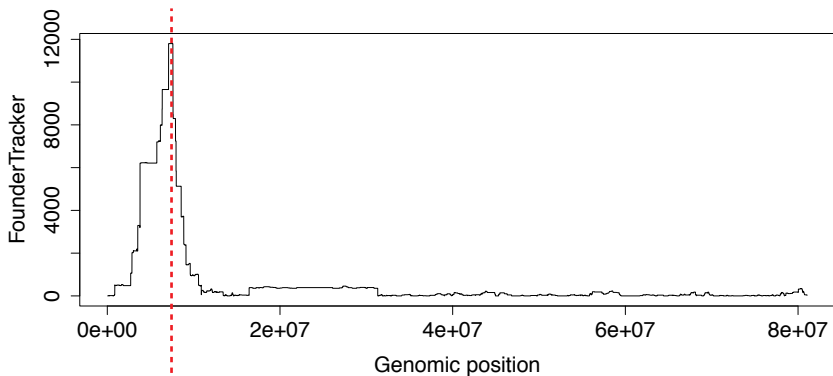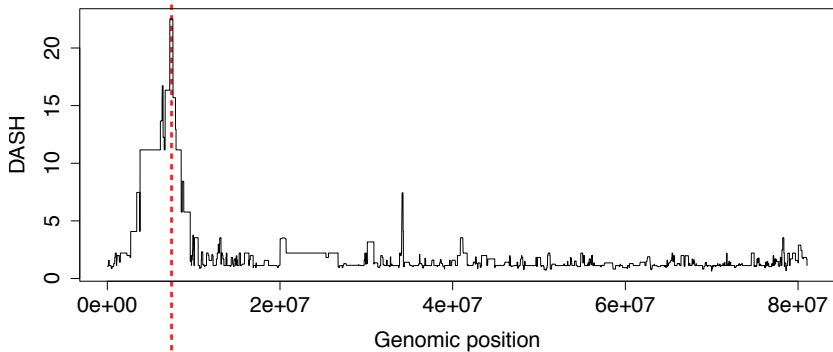

*TP53*
