# Supplementary material for: Identity by Descent Mapping of Founder Mutations in Cancer Using High-Resolution Tumor SNP Data
Source: PubMed Central journal article supplement (PMC3342326; doi:10.1371/journal.pone.0035897), 2012-05-02
Supplement: pone.0035897.s004.pdf [file pone.0035897.s004.pdf]

**0.5 cM**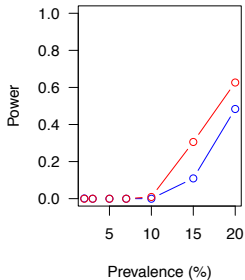**1 cM**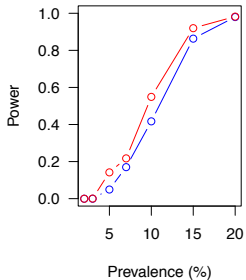**2 cM**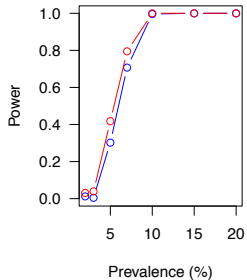**5 cM**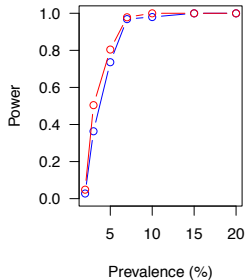

— Illumina CNV370 (373,397 markers)

— Illumina 1M (1,199,187 markers)
